# Supplementary material
Source: PubMed Central journal article supplement (PMC3721434)
Supplement: NIHMS475447-supplement-1.pdf [file NIHMS475447-supplement-1.pdf]

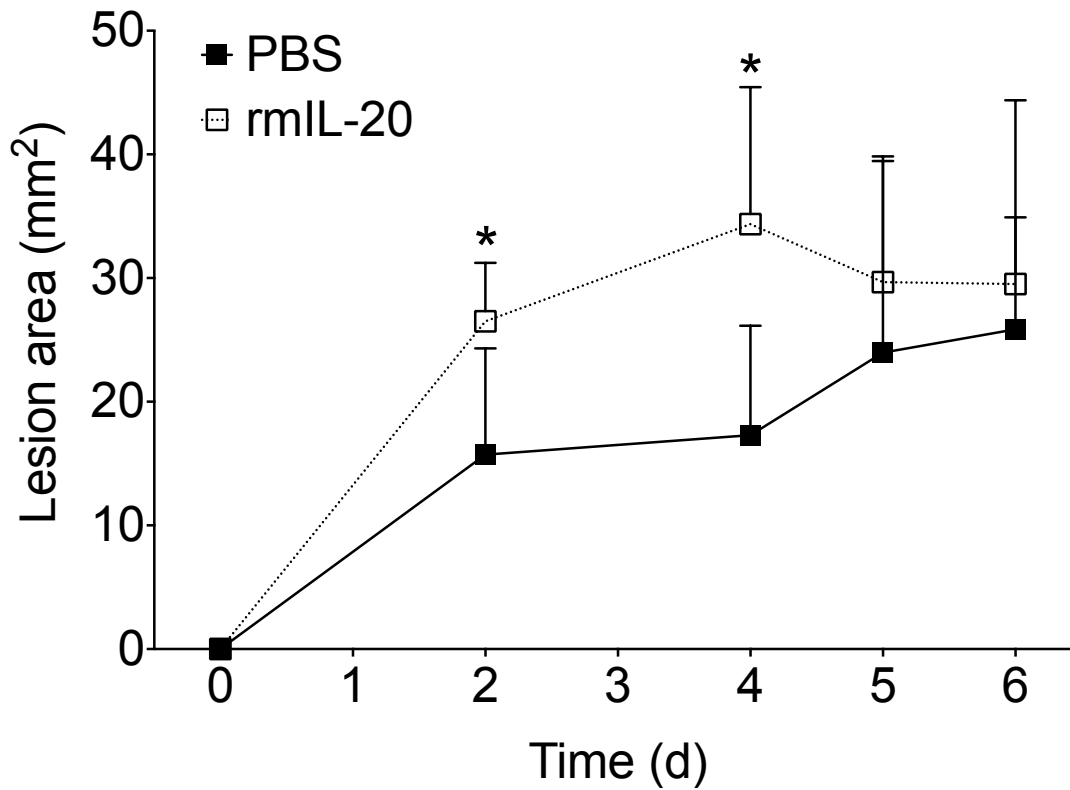

**Supplementary Figure 1. Recombinant IL-20 increases cutaneous MRSA infection.** Lesion area after infection of wild type mice with MRSA suspended in either PBS or recombinant murine IL-20 (rmlL-20, 1  $\mu$ g per injection). Data shown are representative of 3 independent experiments, each using at least 5 mice per group, and displayed as mean + s.e.m.

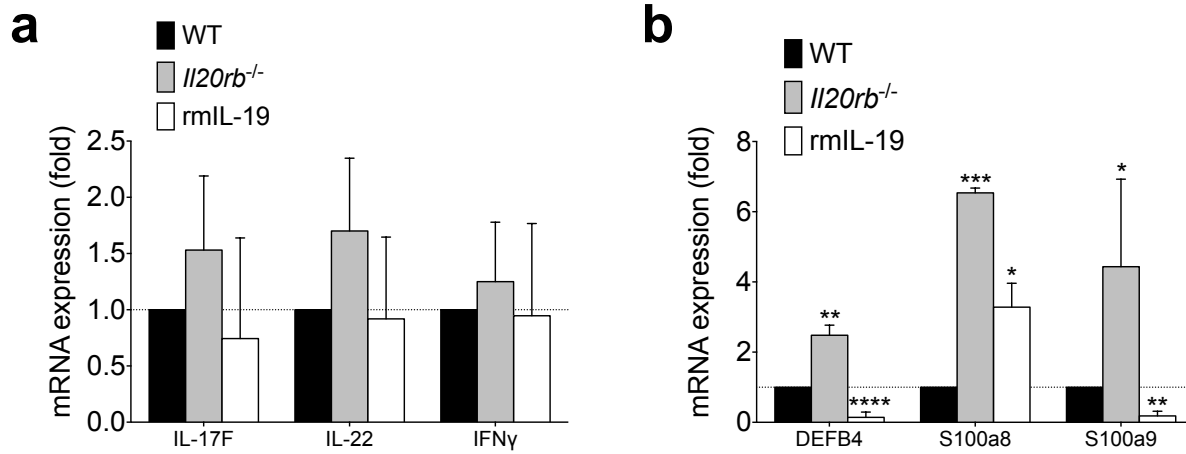

**Supplementary Figure 2. IL-20R signaling alters IL-17A-dependent responses.** (a-b) mRNA expression in infected tissue six days after MRSA inoculation of *Il20rb*<sup>-/-</sup> mice and wild type mice treated with recombinant murine IL-19 (rmlL-19). Expression after 6 days of infection is compared to similarly infected wild type controls not treated with rmlL-19 (WT; dotted line). Data shown are representative of 2 independent experiments, each using 3-5 mice per group, and displayed as mean + s.e.m.

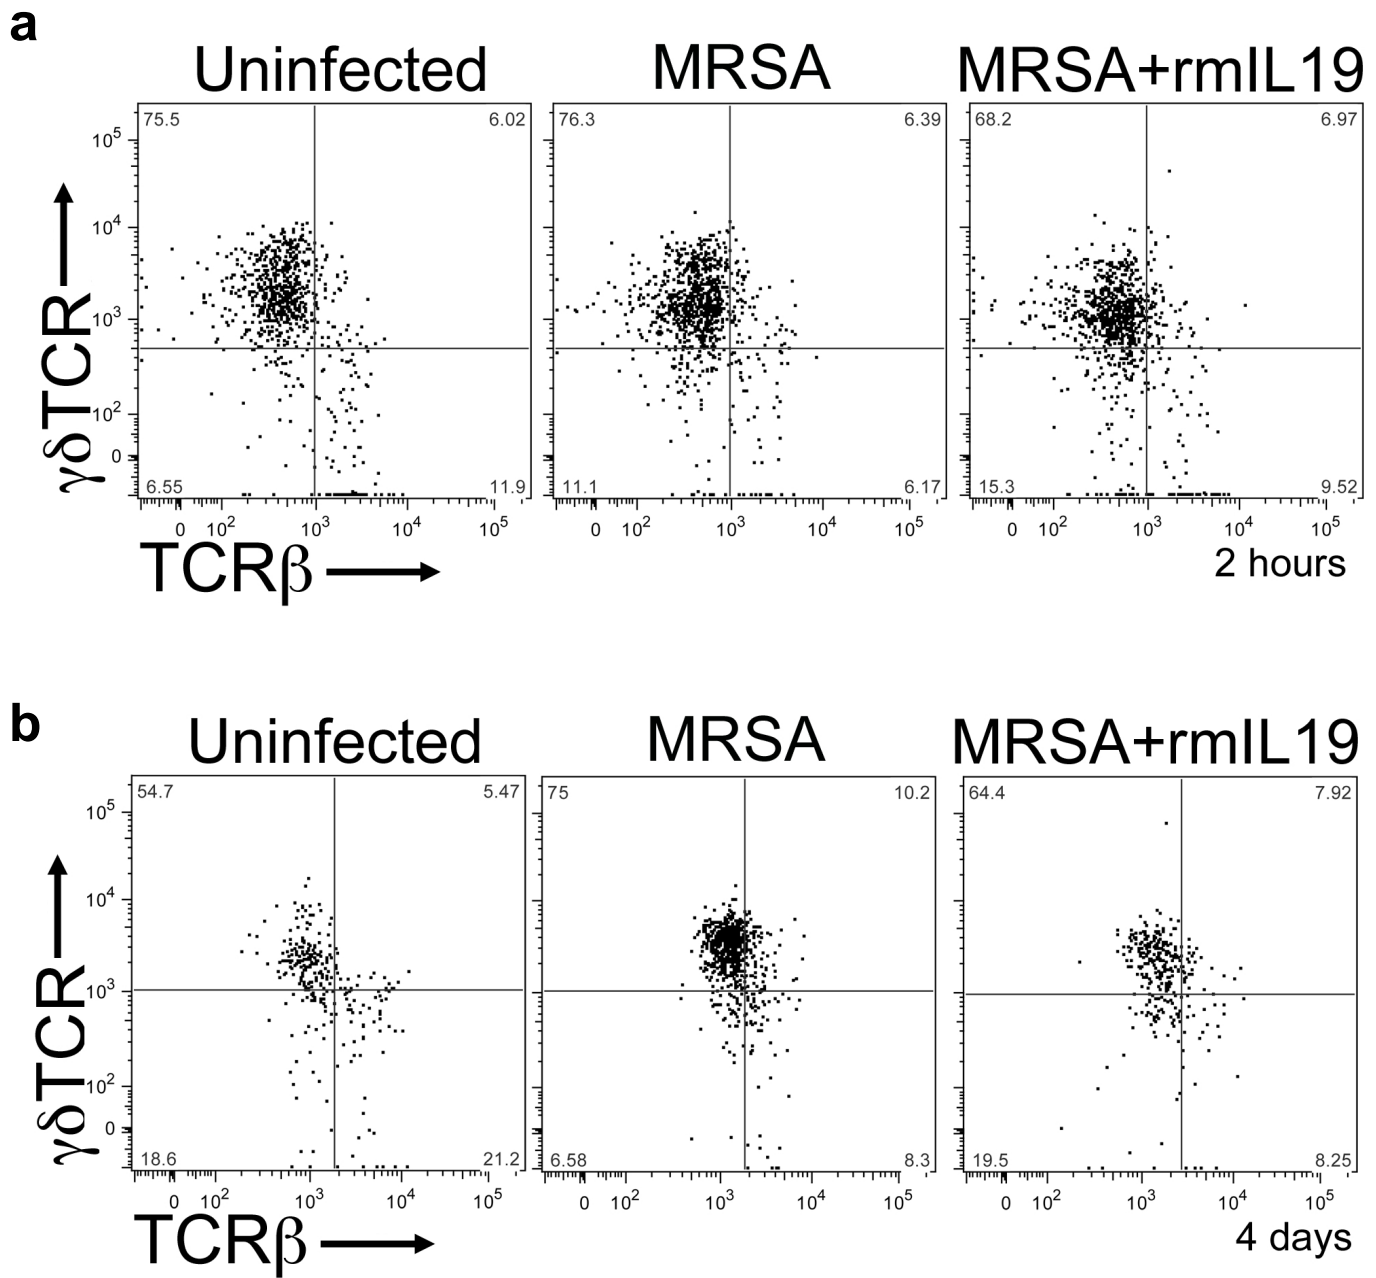

**Supplementary Figure 3.  $\gamma\delta$  T cells are the predominant source of IL-17A during MRSA skin infection.** Representative plots of live CD45+IL17A+ cells stained for  $\gamma\delta$ TCR and TCR- $\beta$  at two hours (a) or four days (b) post-infection. Data shown are representative of 2-3 independent experiments, each using 3-5 mice per group.
